# Supplementary material for: Rarity of microbial species: In search of reliable associations
Source: PubMed Central journal article supplement (PMC6420159; doi:10.1371/journal.pone.0200458), 2019-03-15

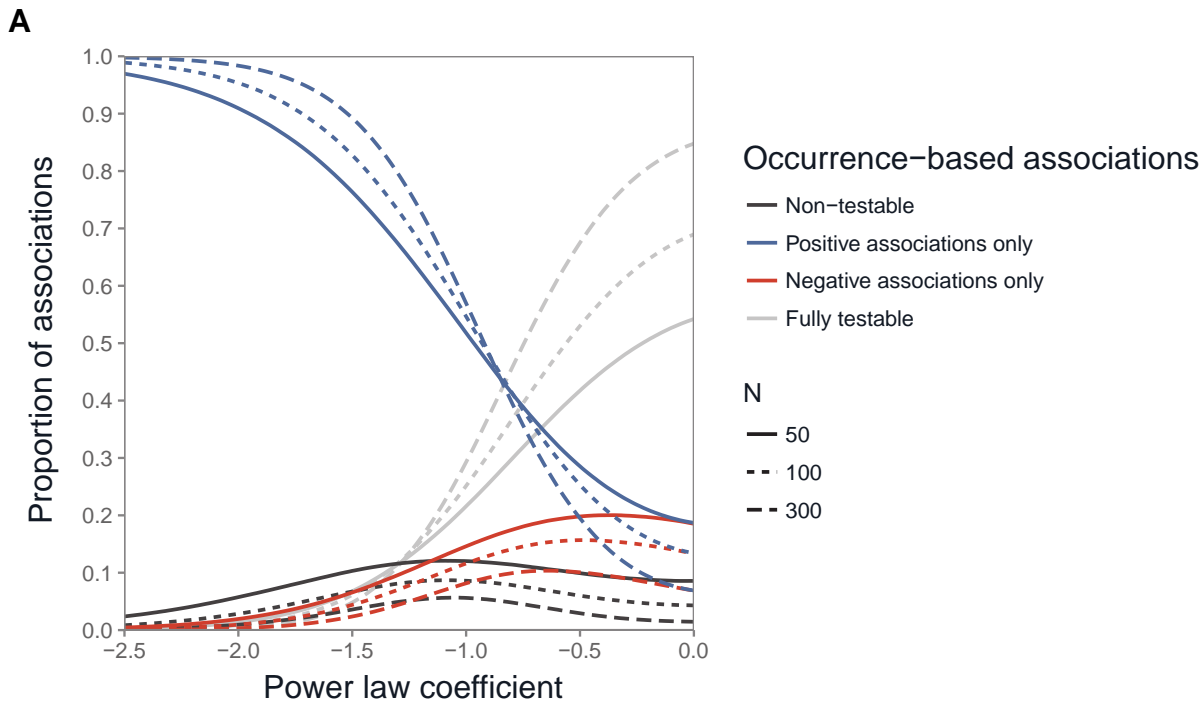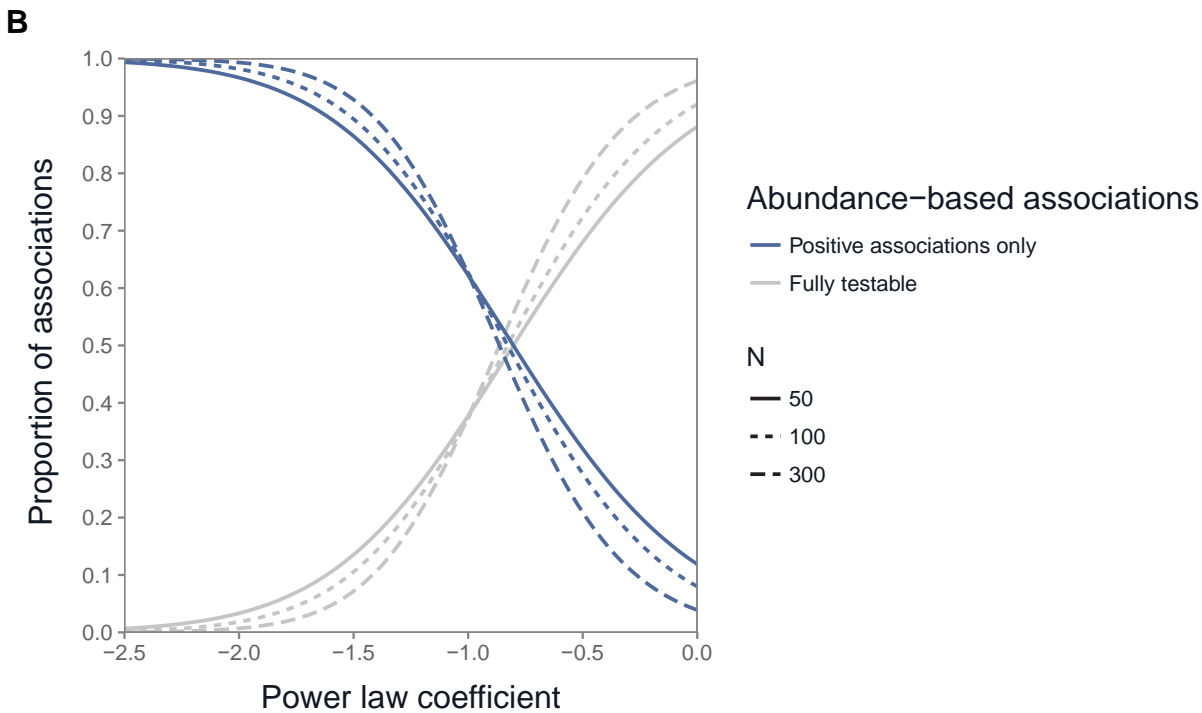

Supplement: pone.0200458.s004.pdf [file pone.0200458.s004.pdf]
